# Supplementary material for: High-throughput screening of stable layered anode materials A2TMO3Cl for chloride-ion batteries
Source: Royal Society of Chemistry journal article supplement (doi:10.1039/d3ta08094c), 2024-01-01
Supplement: d3ta08094c1.pdf [file d3ta08094c1.pdf]

## Supporting Information

# High-Throughput Screening of Stable Layered Anode Materials $A_2TMO_3Cl$ for Chloride-Ion Batteries

Dexing Wang<sup>a#</sup>, Fusheng Zhang<sup>a#</sup>, Jianglong Wang<sup>a</sup>, Xingqiang Shi<sup>a</sup>, Penglai Gong<sup>a</sup>, Huanjuan Liu<sup>a</sup>,  
Mengqi Wu<sup>a,b,\*</sup>, Yingjin Wei<sup>b,\*</sup>, Ruqian Lian<sup>a,\*</sup>

<sup>a</sup>Key Laboratory of Optic-Electronic Information and Materials of Hebei Province, National-Local Joint Engineering Laboratory of New Energy Photoelectric Devices, College of Physics Science and Technology, Hebei University, Baoding 071002, P. R. China.

<sup>b</sup>Key Laboratory of Physics and Technology for Advanced Batteries (Ministry of Education), College of Physics, Jilin University, Changchun 130012, China.

\*Corresponding author:

rqlian@126.com (R. Lian); wumq\_jy@163.com (M. Wu)

# These authors contributed equally: Dexing Wang, Fusheng Zhang.

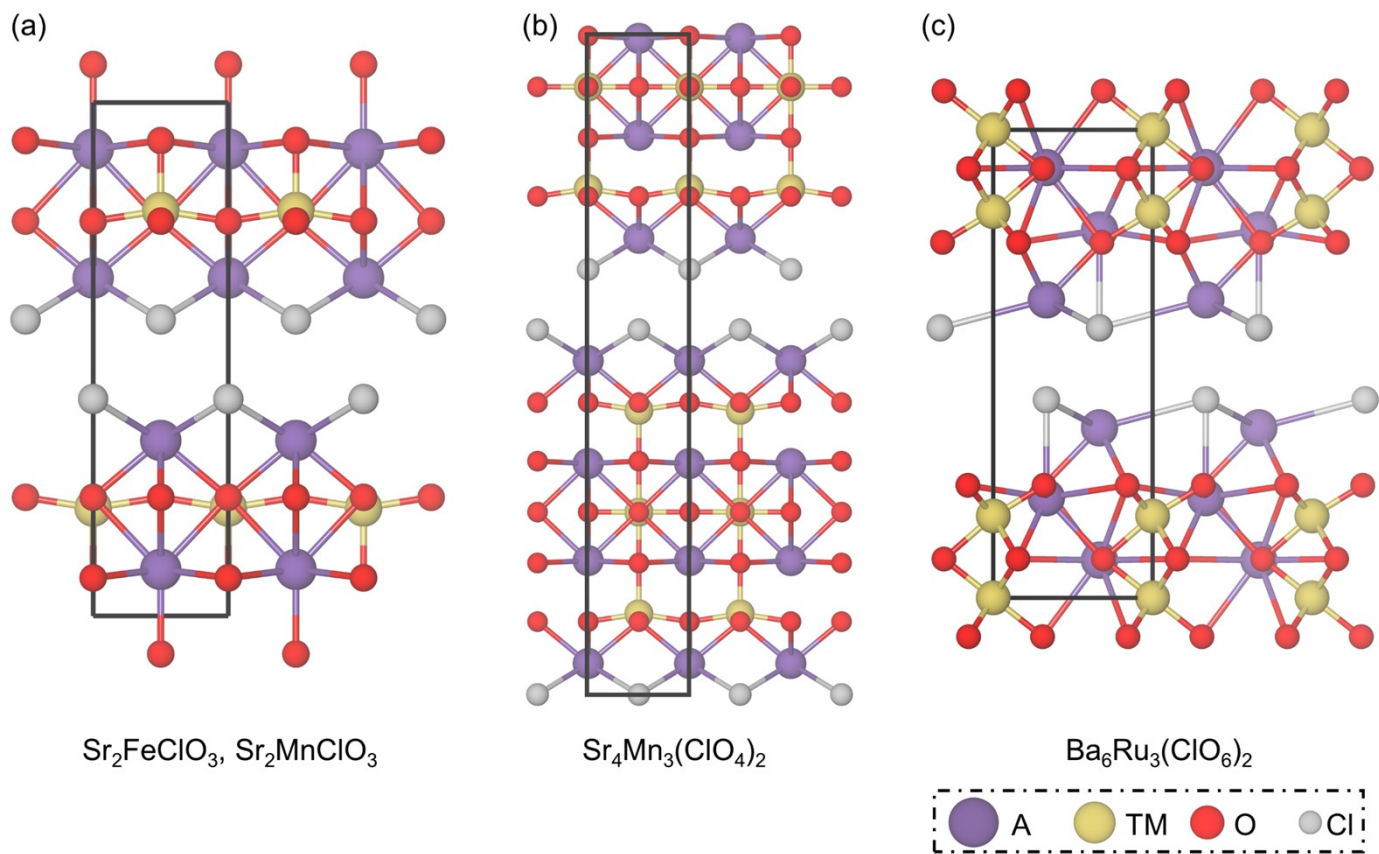

**Figure S1.** Thermodynamically stable conductive of (a)  $\text{Sr}_2\text{FeClO}_3$  and  $\text{Sr}_2\text{MnClO}_3$ , (b)  $\text{Sr}_4\text{Mn}_3(\text{ClO}_4)_2$ , and (c)  $\text{Ba}_6\text{Ru}(\text{ClO}_6)_2$ .

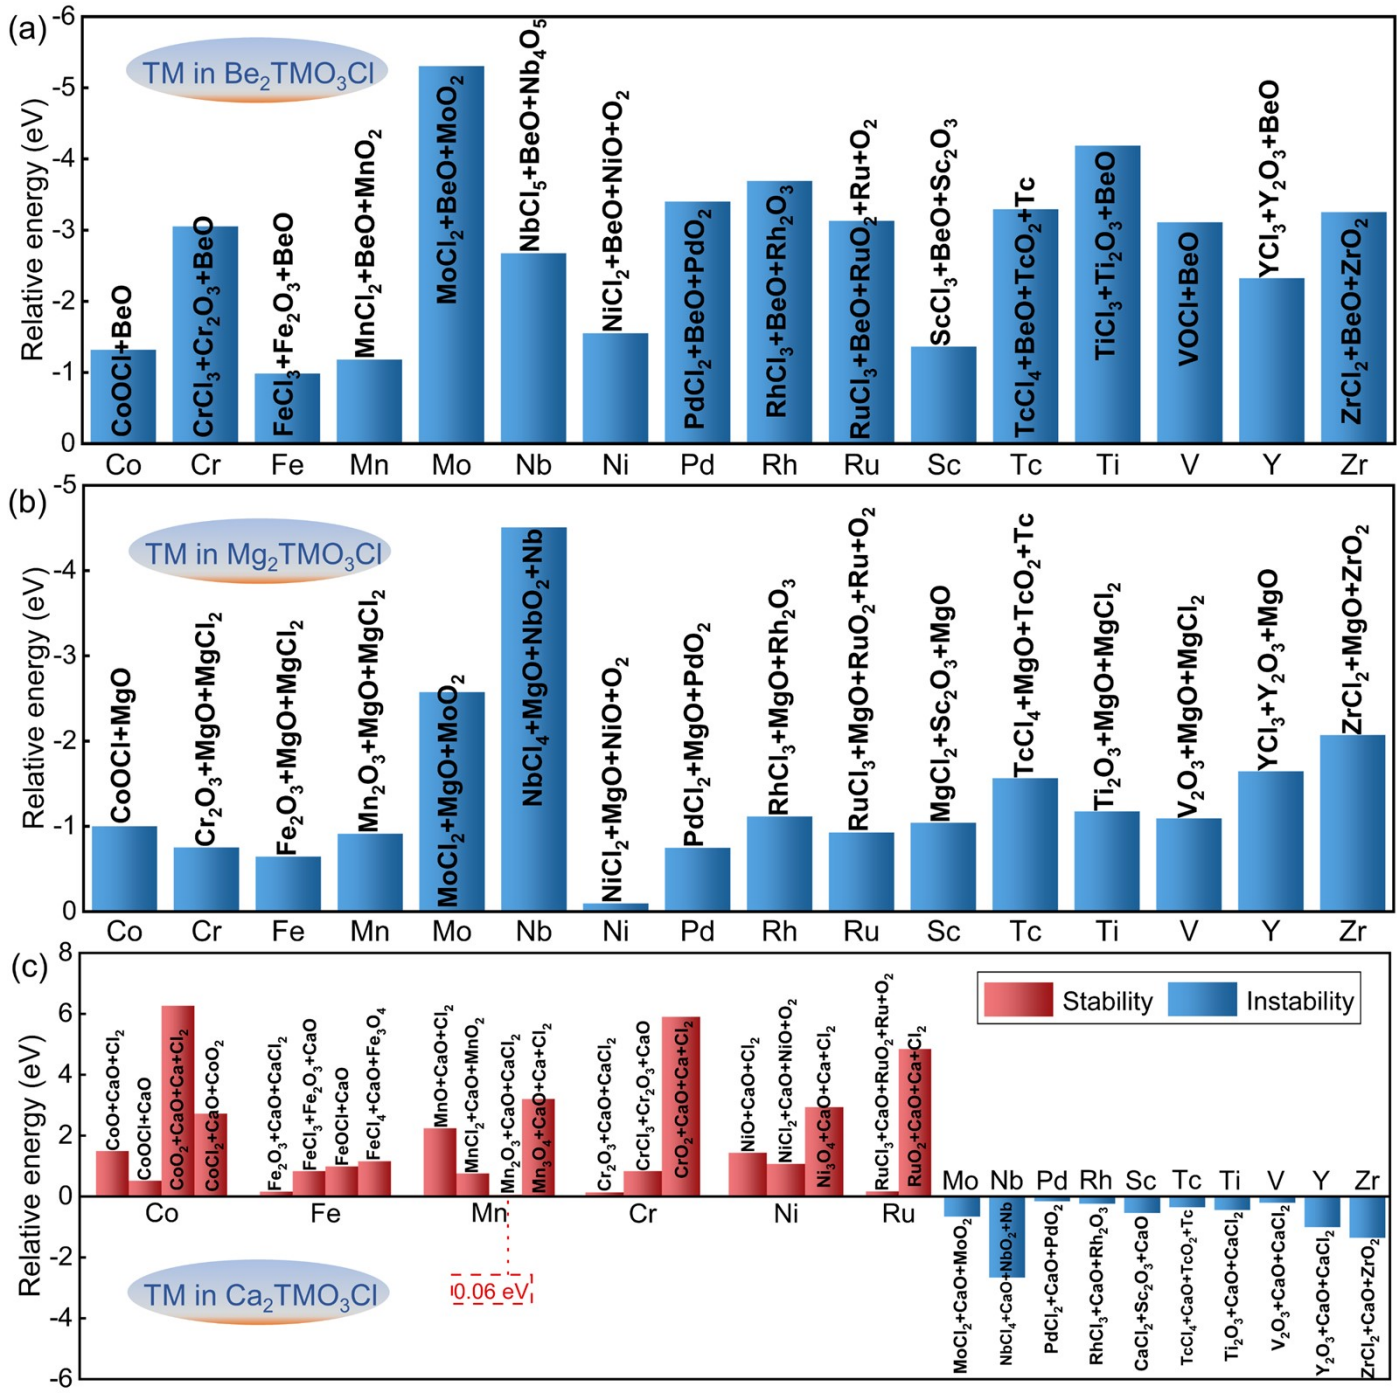

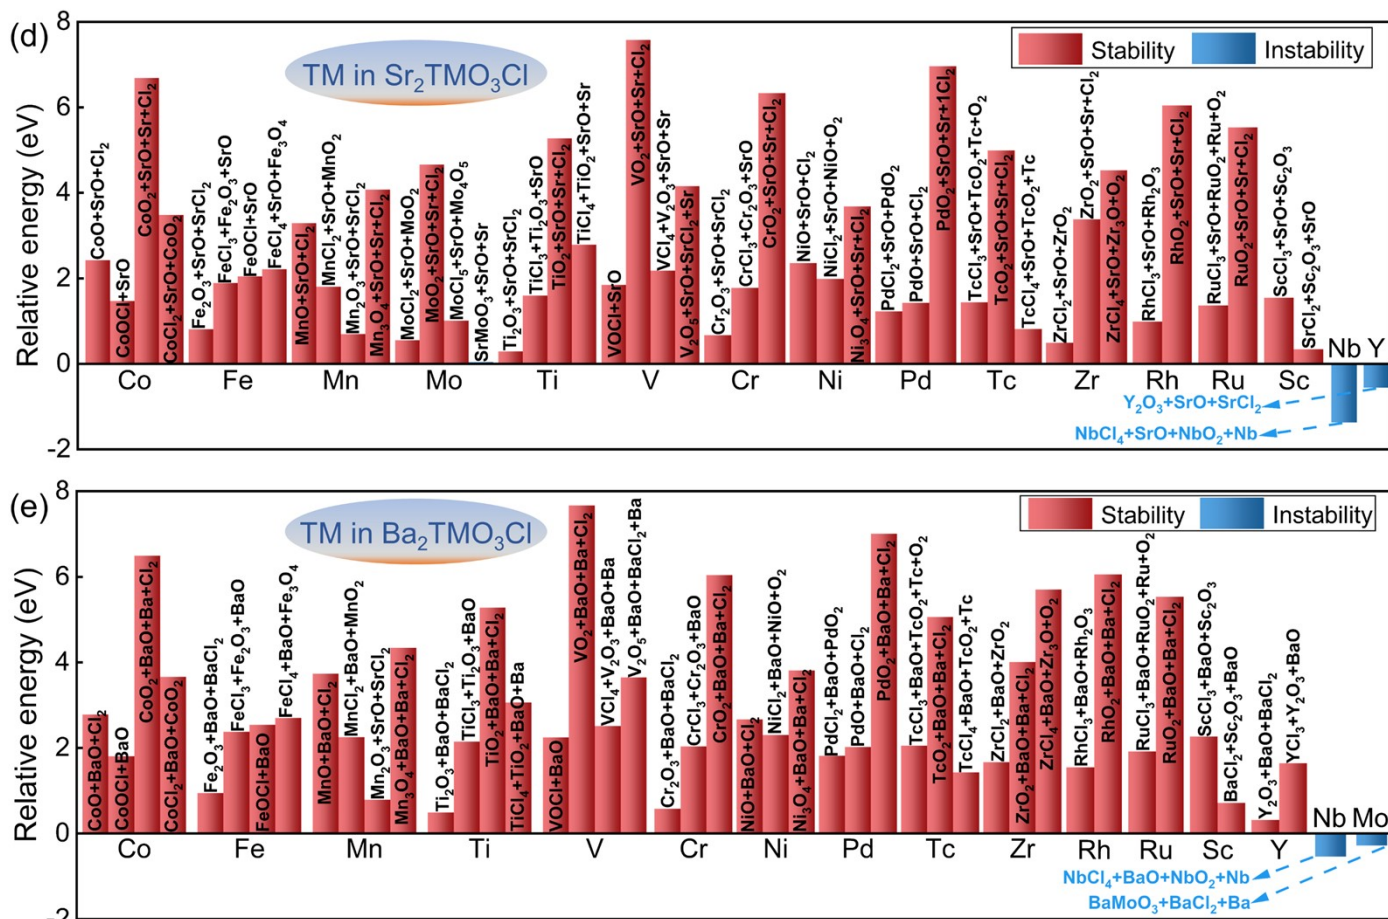

**Figure S2.** Relative energies between  $A_2TMO_3Cl$  and their possible decomposition products. Layered  $A_2TMO_3Cl$  are selected as the reference state. ( $A = Be, Mg, Ca, Sr, Ba$ ;  $TM = Sc, Ti, V, Cr, Mn, Fe, Co, Ni, Y, Zr, Nb, Mo, Tc, Ru, Rh, Pd$ )

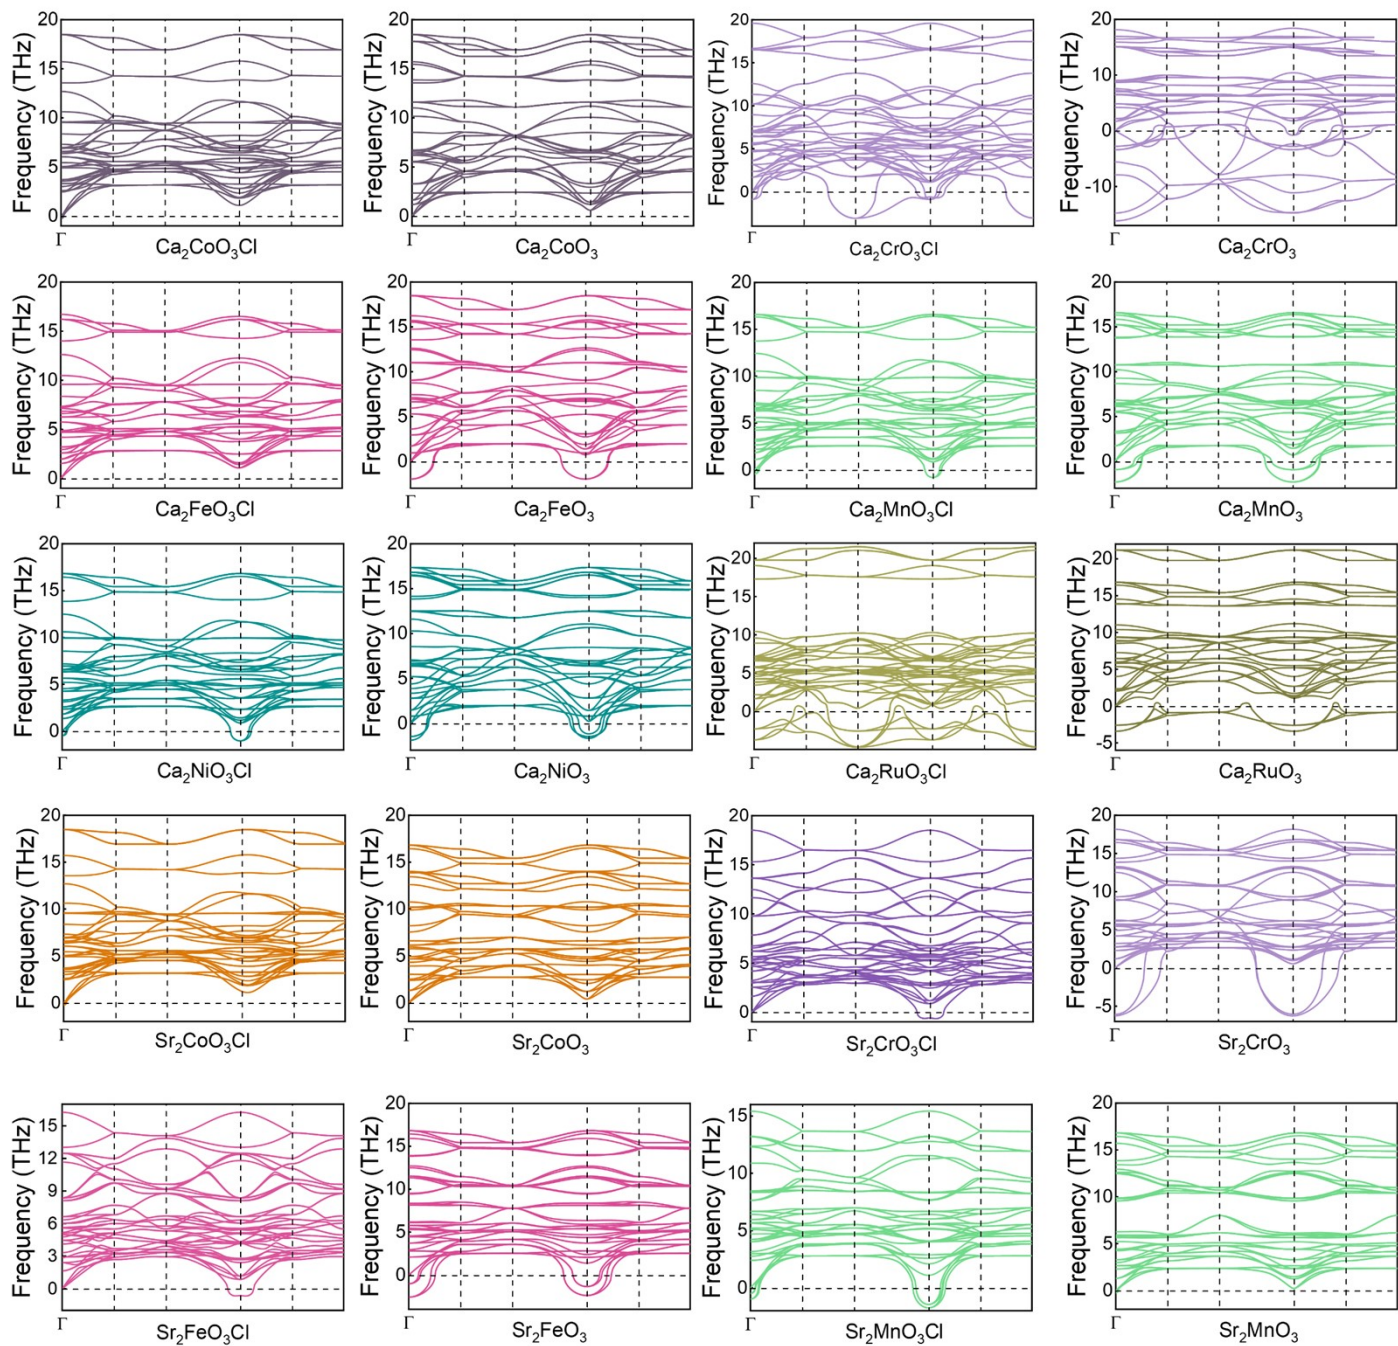

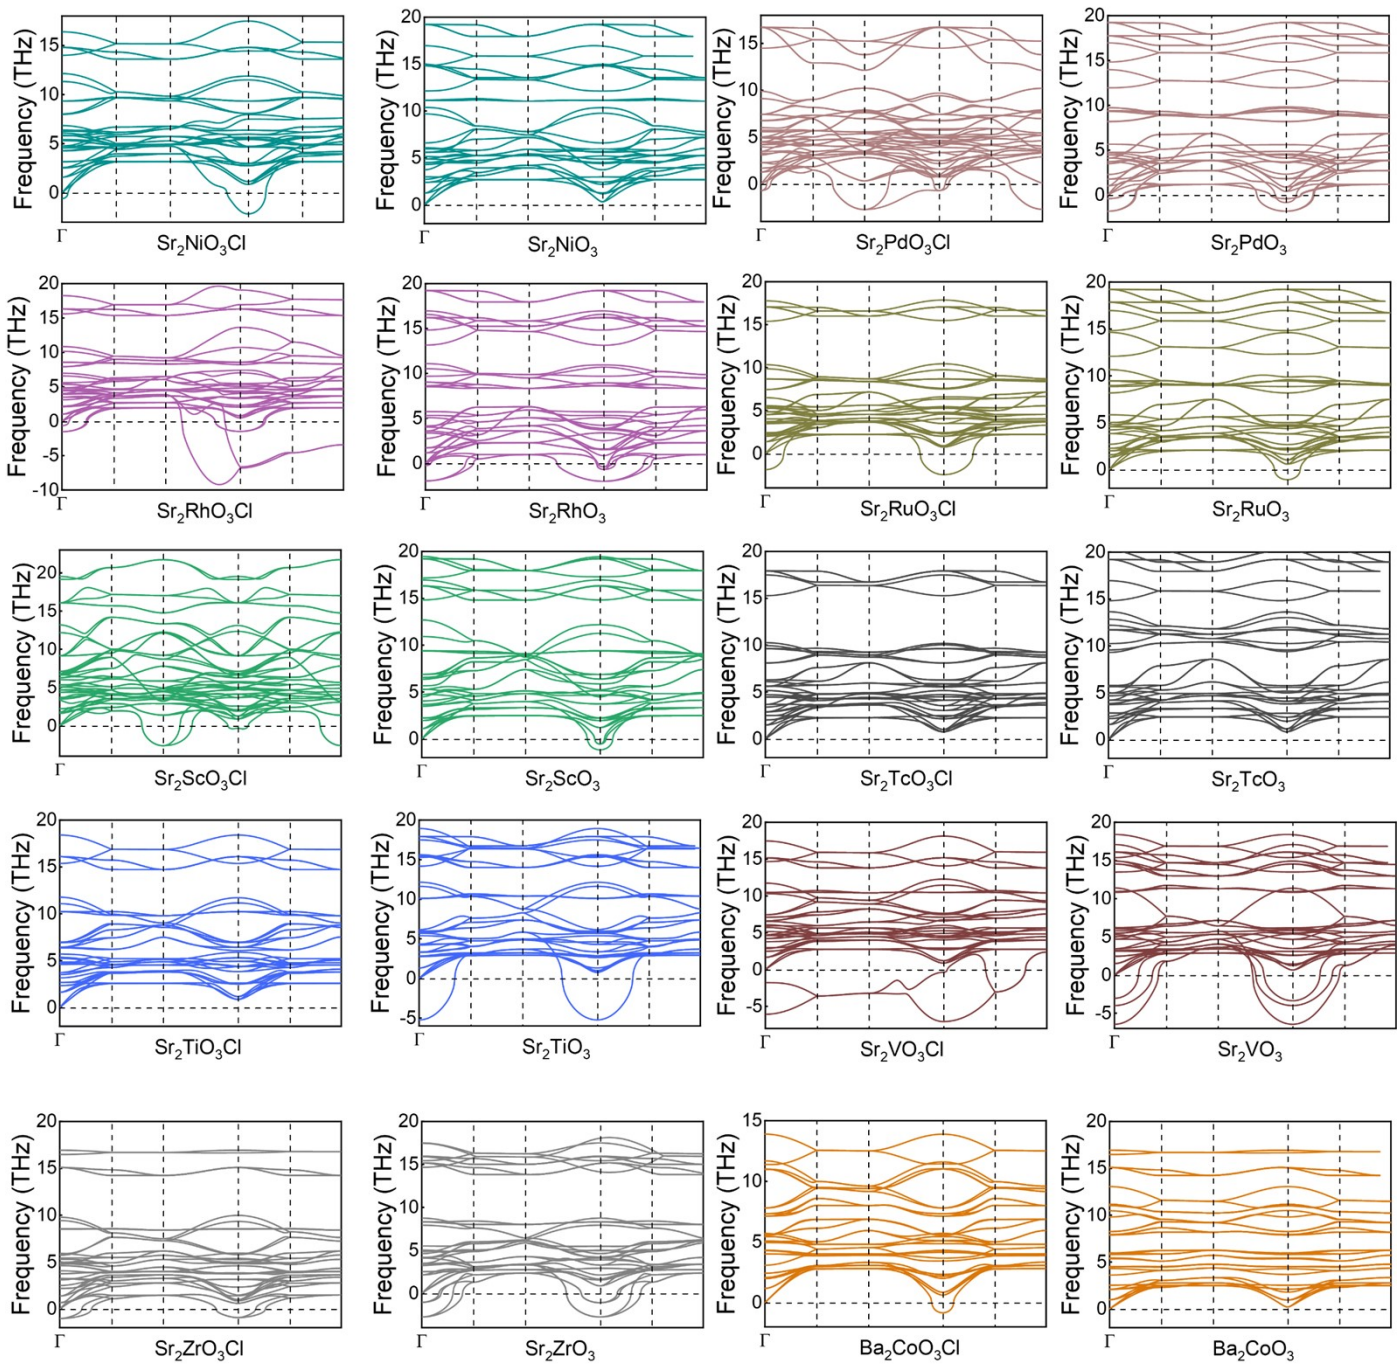

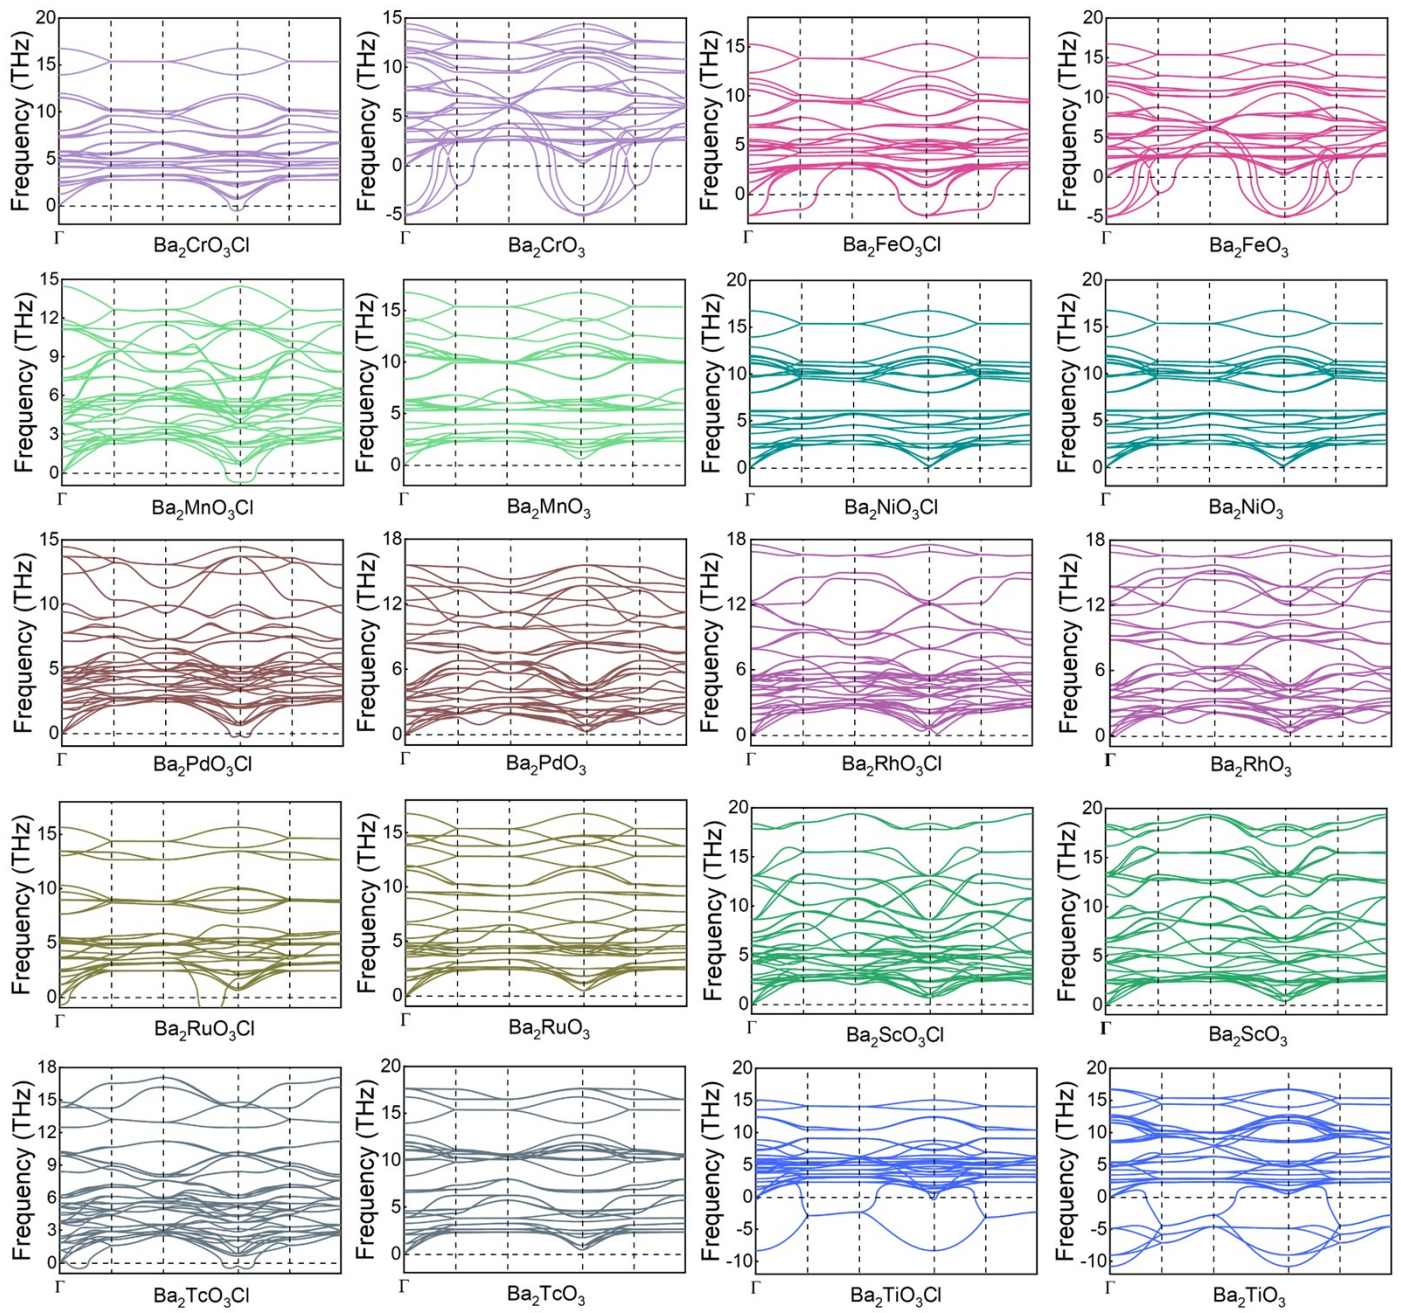

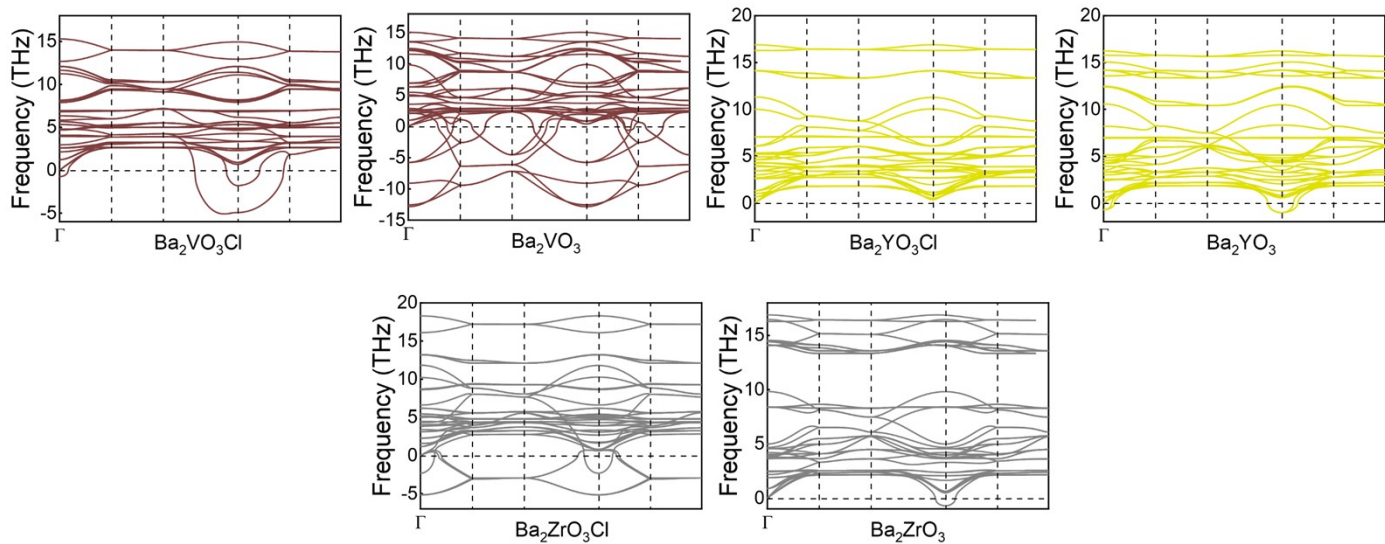

**Figure S3.** Phonon band structures of thermodynamically stable  $A_2TMO_3Cl$  and their dechlorinated states. (A = Ca, TM = Co, Cr, Fe, Mn, Ni, Ru; A = Sr, TM = Co, Cr, Fe, Mn, Ni, Pd, Rh, Ru, Sc, Tc, Ti, V, Zr; A = Ba, TM = Co, Cr, Fe, Mn, Ni, Pd, Rh, Ru, Sc, Tc, Ti, V, Y, Zr).



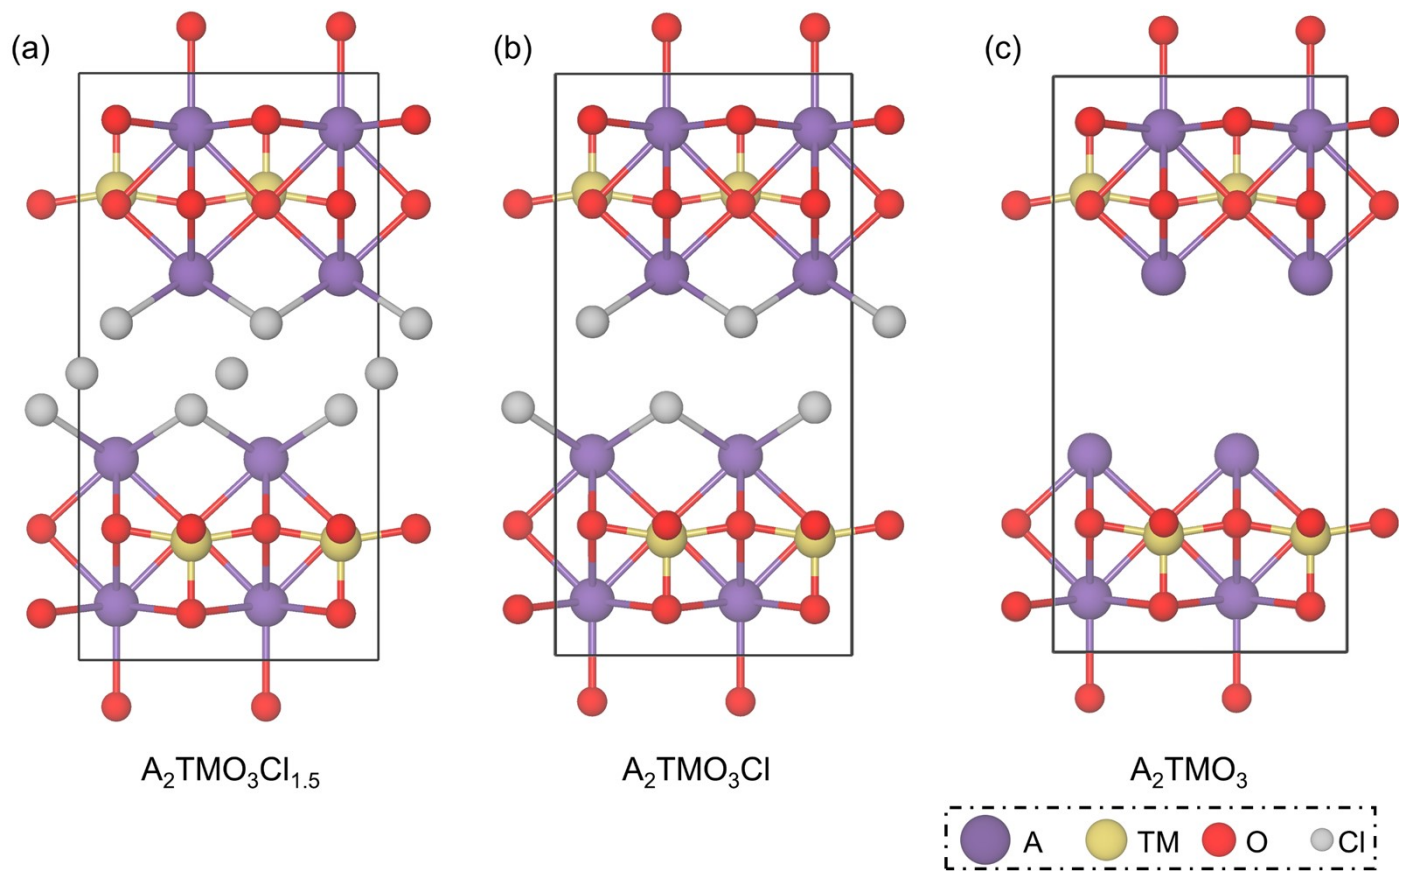

**Figure S4.** The structures of  $A_2TMO_3Cl_x$  at (a)  $x = 1.5$ , (b)  $x = 1$  and (c)  $x = 0$ .

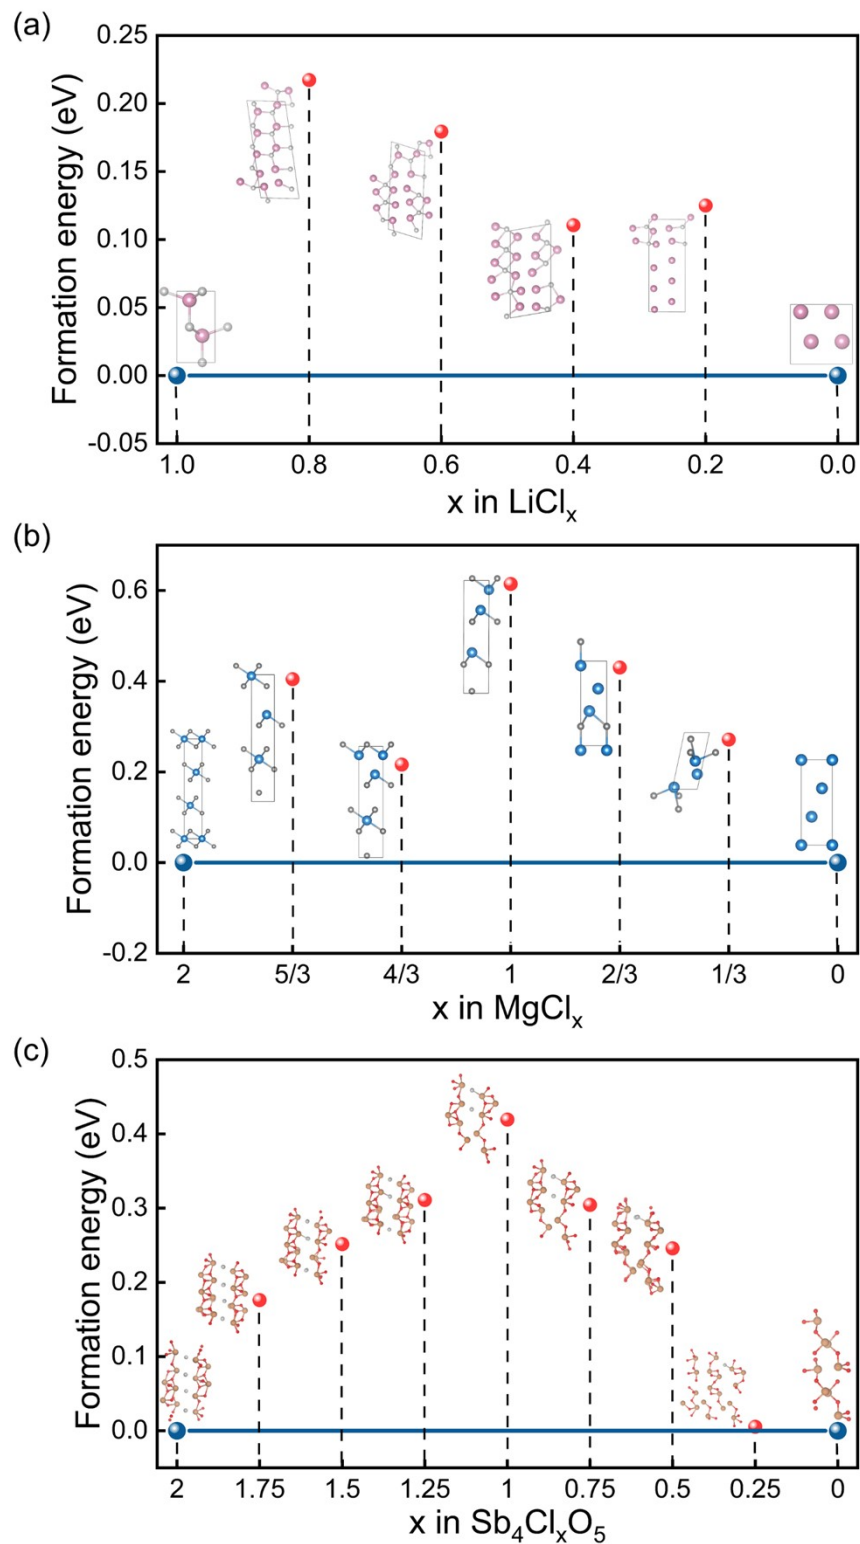

**Figure S5.** Formation energy of (a)  $\text{LiCl}$ , (b)  $\text{MgCl}_2$  and (c)  $\text{Sb}_4\text{Cl}_2\text{O}_5$ .

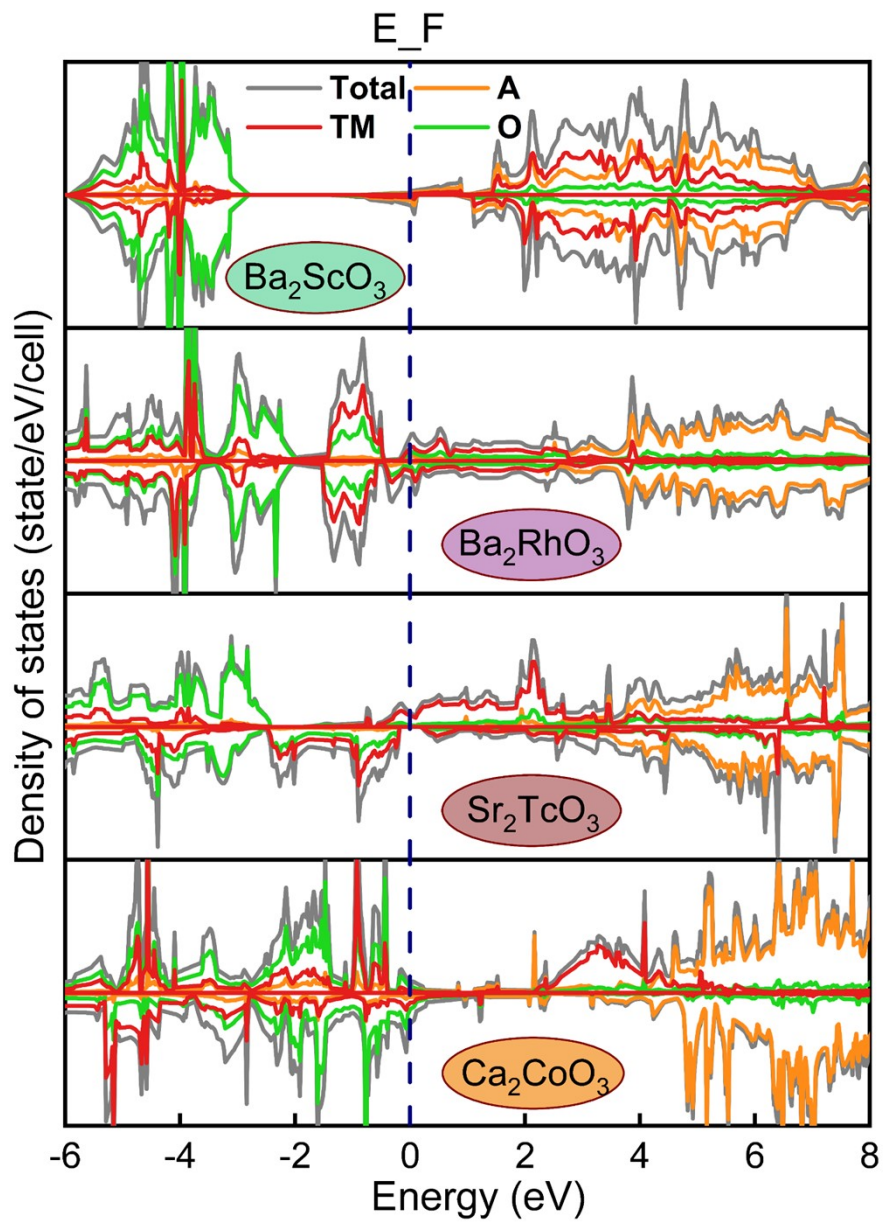

**Figure S6.** Partial density of states of A, TM, and O (A = Ca, TM = Co; A = Sr, TM = Tc; A = Ba, TM = Sc, Rh)

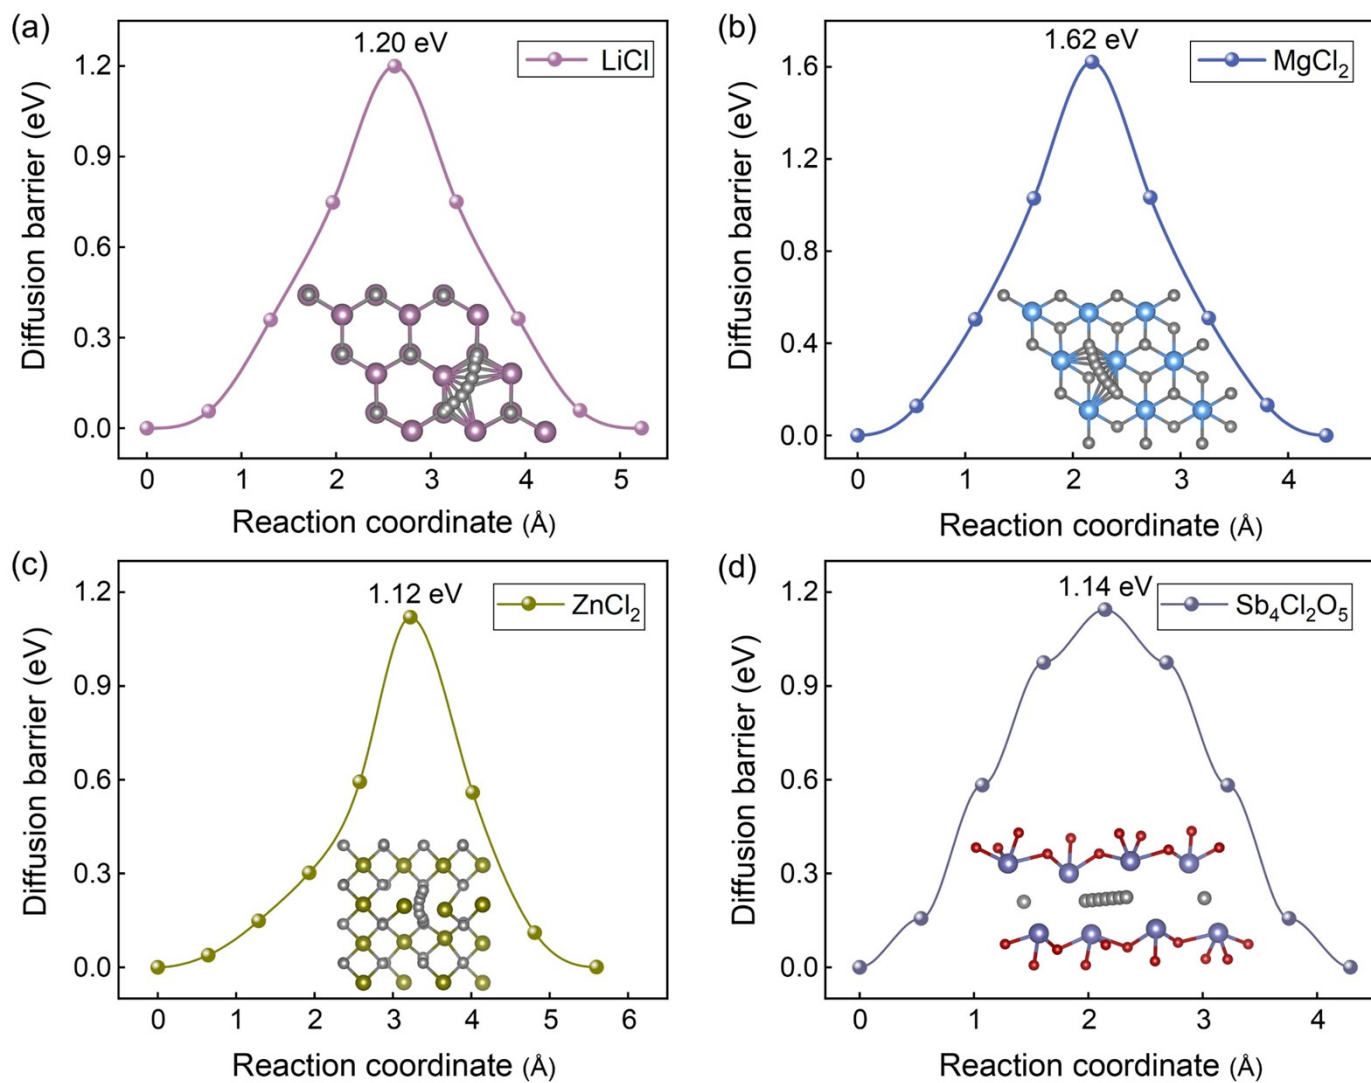

**Figure S7.** Distribution of Cl<sup>-</sup> diffusion barrier in reported (a) LiCl, (b) MgCl<sub>2</sub>, (c) ZnCl<sub>2</sub>, and (d) Sb<sub>4</sub>Cl<sub>2</sub>O<sub>5</sub>.

**Table S1.** Crystal system, space group, and Cl-layer Observed of thermodynamically stable conductive compounds that containing A, TM, O, and Cl.

| Compound                                      | Crystal system | Space group | Cl-layer Observed |
|-----------------------------------------------|----------------|-------------|-------------------|
| $\text{Sr}_2\text{FeClO}_3$                   | Tetragonal     | P4/nmm      | Yes               |
| $\text{Sr}_2\text{MnClO}_3$                   | Tetragonal     | P4/nmm      | Yes               |
| $\text{Sr}_4\text{Mn}_3(\text{ClO}_4)_2$      | Tetragonal     | I4/mmm      | Yes               |
| $\text{Ba}_6\text{Ru}_3(\text{ClO}_6)_2$      | Trigonal       | P3m1        | Yes               |
| $\text{Rb}_2\text{Pu}(\text{Cl}_2\text{O})_2$ | Monoclinic     | C12/m1      | No                |
| $\text{Cs}_2\text{Pu}(\text{Cl}_2\text{O})_2$ | Monoclinic     | C12/m1      | No                |
| $\text{Sr}_2\text{CrClO}_4$                   | Orthorhombic   | Pbcm        | No                |
| $\text{Sr}_2\text{Cu}(\text{ClO})_2$          | Tetragonal     | I4/mmm      | Yes               |
| $\text{Ba}_2\text{Cu}_3(\text{ClO}_2)_2$      | Tetragonal     | I4/mmm      | No                |
| $\text{Ba}_4\text{Os}_6\text{ClO}_{18}$       | Cubic          | I23         | No                |

**Table S2.** Bader charge ( $e$ ) of A, TM, Cl, and O for  $\text{Ca}_2\text{CoO}_3(\text{Cl})$ ,  $\text{Sr}_2\text{TcO}_3(\text{Cl})$ ,  $\text{Ba}_2\text{ScO}_3(\text{Cl})$ , and  $\text{Ba}_2\text{RhO}_3(\text{Cl})$ , respectively.

| Compound                           | A    | TM   | Cl    | O     |
|------------------------------------|------|------|-------|-------|
| $\text{Ca}_2\text{CoO}_3\text{Cl}$ | 1.53 | 1.29 | -0.78 | -1.19 |
| $\text{Ca}_2\text{CoO}_3$          | 1.32 | 1.19 | -     | -1.28 |
| $\text{Sr}_2\text{TcO}_3\text{Cl}$ | 1.53 | 1.49 | -0.78 | -1.25 |
| $\text{Sr}_2\text{TcO}_3$          | 1.38 | 1.06 | -     | -1.28 |
| $\text{Ba}_2\text{ScO}_3\text{Cl}$ | 1.52 | 1.68 | -0.80 | -1.31 |
| $\text{Ba}_2\text{ScO}_3$          | 1.40 | 1.19 | -     | -1.33 |
| $\text{Ba}_2\text{RhO}_3\text{Cl}$ | 1.53 | 1.13 | -0.78 | -1.13 |
| $\text{Ba}_2\text{RhO}_3$          | 1.48 | 0.74 | -     | -1.23 |
